# Supplementary material for: Identification of novel CD8+ T cell epitopes in human herpesvirus 6B U11 and U90
Source: PubMed Central journal article supplement (PMC4444154; doi:10.1002/iid3.55), 2015-04-28
Supplement: iid30003-0118-sd1.pdf [file iid30003-0118-sd1.pdf]

### Supporting Information Figure 1

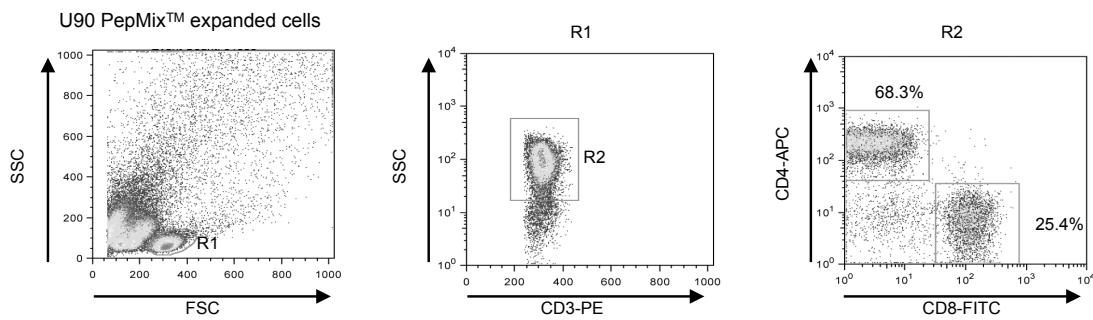

**A representative example of the flow cytometry analysis of the frequency of CD4+ and CD8+ T cells in a PepMix™ expanded T cell population.** PBMC from donor HD49 were stimulated with U90 PepMix™ for 10 days before cells were stained with anti-CD3-PE, anti-CD4-APC and anti-CD8-FITC, and analysed by flow cytometry. Lymphocytes were identified based on their forward- and side-scatter properties. The gated population (R1) was analysed for CD3+ cells, this population was then analysed for CD4+ and CD8+ T cells. Values indicated denote the percentage of CD4+ or CD8+ cells.

### Supporting Information Figure 2

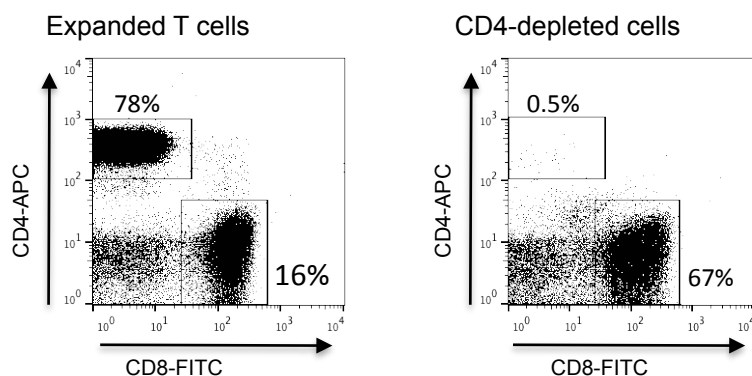

**A representative example of the flow cytometry analysis of the efficiency of CD4+ T cell depletion from PepMix™ expanded T cell population.** PBMC (from donor

HD53) were stimulated with U90 PepMix™ for 10 days before CD4+ T cells were depleted using EasySep™ Human CD4 Positive Selection Kit (STEMCELL, Manchester, U.K.). Expanded T cells before and after depletion were stained with anti-CD4-APC and anti-CD8-FITC, and analysed by flow cytometry. Lymphocytes were identified based on their forward- and side-scatter properties, and analysed for CD4+ and CD8+ T cells. Values indicated denote the percentage of CD4+ or CD8+ cells.

### Supporting Information Figure 3

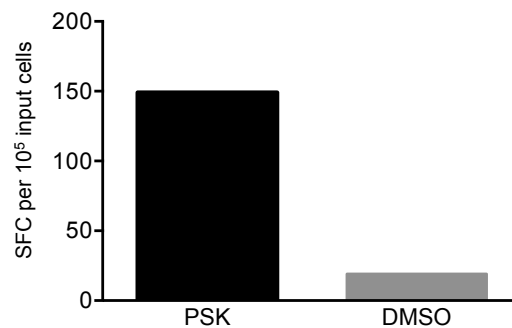

**Identification of a T cell response to HLA-A29 restricted T cell peptide PSKSKKIKL in donor HD33.** PBMC from donor HD33 (HLA A11, A29, B39, B44, C9, C16) were stimulated with the PSK peptide for 10 days. ELISpot analysis of the expanded T cell culture shows that donor HD33 contains T cells reactive to this HLA-A29 restricted 9-mer peptide from U90.

## Supporting Information Figure 4

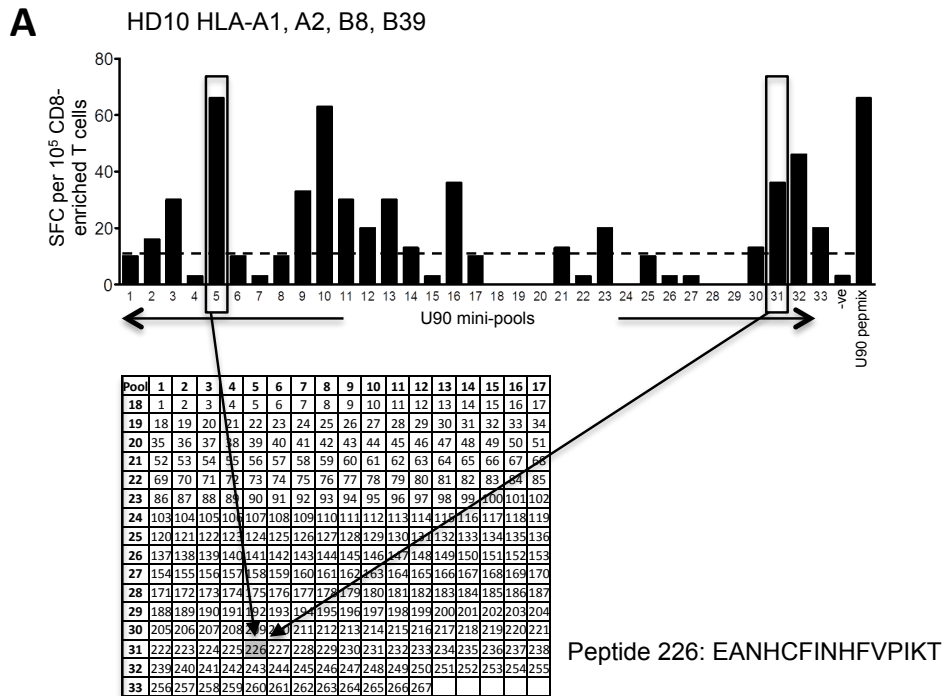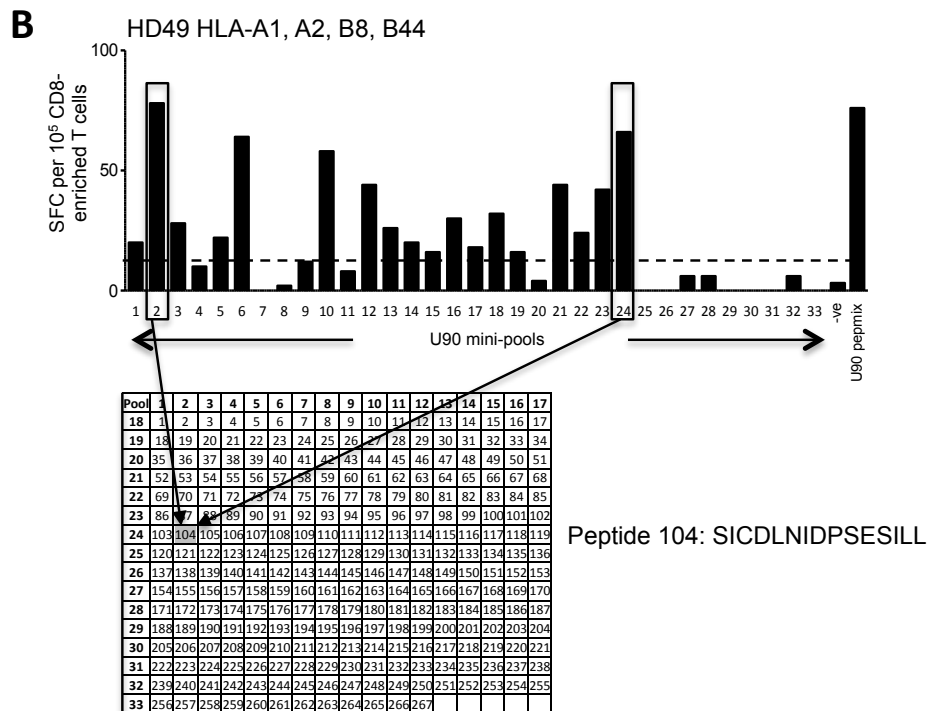

**Identification of T cell responses to 15-mer peptide 226 in donor HD10 and peptide 104 in donor HD49.** U90 PepMix™ expanded, CD4+ T cell-depleted, polyclonal T cell populations from (A) Donor HD10 and (B) Donor HD49 were screened by ELISPOT against the U90 15-mer mini-pools. For donor HD10, the intersect between mini-pools 5 and 31, peptide 226 (EANHCFINHFVPIKT), and for donor HD49, the intersect between pools 2 and 24, peptide 104 (SICDLNIDPSESILL) were selected for further analysis (see main text).

## Supporting Information Figure 5

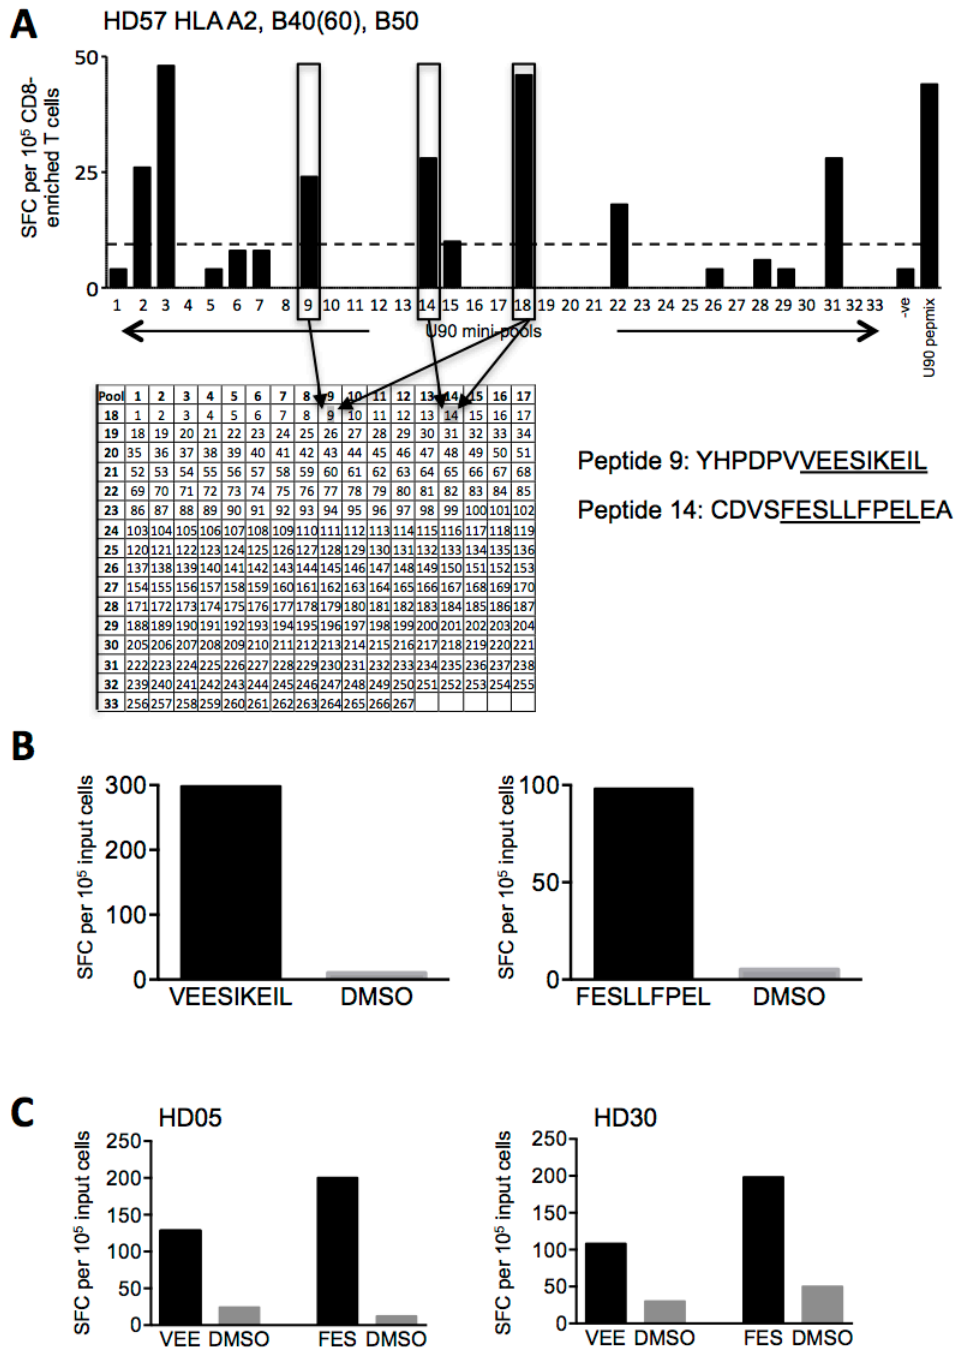

### Identification of T cell responses to HLA-B40 restricted T cell peptides VEESIKEL and

FESLLFPEL. (A) The graph shows the results of an ELISPOT screen, using the 15-mer

mini-pools, of U90 PepMix™ expanded polyclonal T cell populations from donor

HD57 after depletion of CD4+ T cells. The 15-mer peptides representing the

intersect between mini-pools 9 and 18, peptide 9 (YHPDPVVEESIKEL), and pools 14 and 18, peptide 14 (CDVSFESLLFPELEA) were identified as positive responses in this donor. These peptides contain the previously identified HLA-B40 restricted peptides VEESIKEL and FESLLFPEL. (B) Subsequent ELISPOT screening of the expanded T cell populations showed that donor HD57 contained CD8+ T cells reactive to the VEE and FES peptides. (C) PBMC from two further HLA-B40 positive donors (HD05, HLA-A2, A24, B44, B40(60)) and HD30, HLA-A2, A32, B7, B40(60)) were stimulated *in-vitro* with the VEE and FES peptide, and the expanded T cells were screened by ELISPOT and shown to containing responses to both peptides.

#### Supporting Information Figure 6

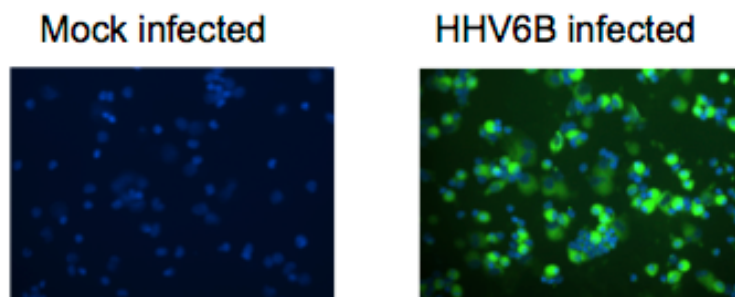

**Immunostaining of HHV6 Z29 infected targets.** Efficient viral infection of target cells in T cell assays was confirmed by immunofluorescent staining of HHV6B-infected and mock-infected cells with mouse-anti-human HHV6B mAb. The images shown are a representative example of the targets used in T cell assays.
